# Supplementary material for: Oxidative Stress and Inflammatory Biomarkers for the Prediction of Severity and ICU Admission in Unselected Patients Hospitalized with COVID-19
Source: MDPI journal article supplement (doi:10.3390/ijms22147462), 2021-07-12
Supplement: s1 [file s1]

**Oxidative stress and inflammatory biomarkers for the prediction of severity and ICU admission in unselected patients hospitalized with COVID-19”**

**Supplementary tables**

**Table S1.** Correlations coefficients between studied and routine biomarkers

| Type of biomarker  | Oxidative Stress Biomarkers |            |           | Inflammatory biomarkers |            |           |          |            | Cell activation biomarkers |                  |                   |
|--------------------|-----------------------------|------------|-----------|-------------------------|------------|-----------|----------|------------|----------------------------|------------------|-------------------|
| Biomarker          | Thiols (log)                | AOPP (log) | IMA (log) | IL-6 (log)              | PSEP (log) | CRP (log) | Albumin  | Fibrinogen | Calprotectin (log)         | Leukocytes (log) | Neutrophils (log) |
| Thiols (log)       |                             | -0.313**   | -0.506**  | -0.460**                | -0.438**   | -0.445**  | 0.615**  | -0.292**   | -0.508**                   | -0.411**         | -0.495**          |
| AOPP (log)         |                             |            | 0.158*    | 0.282**                 | 0.172*     | 0.118     | -0.309*  | -0.035     | 0.241*                     | 0.153*           | 0.249*            |
| IMA (log)          |                             |            |           | 0.411**                 | 0.328**    | 0.580**   | -0.357** | 0.386**    | 0.367**                    | 0.248*           | 0.326**           |
| IL-6 (log)         |                             |            |           |                         | 0.546**    | 0.634**   | -0.394** | 0.447**    | 0.463**                    | 0.205*           | 0.461**           |
| PSEP (log)         |                             |            |           |                         |            | 0.475**   | -0.414** | 0.281*     | 0.379**                    | 0.302**          | 0.429**           |
| CRP (log)          |                             |            |           |                         |            |           | -0.458** | 0.571**    | 0.544**                    | 0.250*           | 0.378**           |
| Albumin            |                             |            |           |                         |            |           |          | -0.199     | -0.502**                   | -0.397**         | -0.465**          |
| Fibrinogen         |                             |            |           |                         |            |           |          |            | 0.472**                    | 0.306**          | 0.357**           |
| Calprotectin (log) |                             |            |           |                         |            |           |          |            |                            | 0.362**          | 0.565**           |
| Leukocytes (log)   |                             |            |           |                         |            |           |          |            |                            |                  | 0.869**           |
| Neutrophils (log)  |                             |            |           |                         |            |           |          |            |                            |                  |                   |

For this analysis, a log-transformation was performed and indicated by (log) when the distribution was not normal.

\* p<0.05; \*\* p<0.001; Correlation coefficient absolute values below 0.3 are considered to be weak (yellow), from 0.3 to 0.7 are moderate (orange) and above >0.7 are strong (red).

**Table S2.** Oxidative stress (OS) and inflammation biomarkers concentrations according to increased O<sub>2</sub> needs

| Type of biomarker                  | Biomarker                  | No increased O <sub>2</sub> needs |        |              | Increased O <sub>2</sub> needs |        |               | <i>p</i> |
|------------------------------------|----------------------------|-----------------------------------|--------|--------------|--------------------------------|--------|---------------|----------|
|                                    |                            | N                                 | Median | IQR          | N                              | Median | IQR           |          |
| <b>Oxidative Stress Biomarkers</b> | <b>Thiols (μM)</b>         | 71                                | 197    | 149 to 275   | 89                             | 130    | 91 to 164     | <0.001   |
|                                    | <b>AOPP (μM)</b>           | 71                                | 59     | 7 to 174     | 88                             | 111    | 47 to 220     | 0.009    |
|                                    | <b>IMA (ABSU)</b>          | 70                                | 0.17   | 0.11 to 0.24 | 88                             | 0.20   | 0.17 to 0.27  | <0.001   |
| <b>Inflammatory biomarkers</b>     | <b>IL-6 (ng/L)</b>         | 71                                | 12.7   | 1.5 to 32.9  | 89                             | 80.0   | 27.8 to 158.8 | <0.001   |
|                                    | <b>PSEP (ng/L)</b>         | 71                                | 416    | 250 to 713   | 88                             | 879    | 532 to 1668   | <0.001   |
| <b>cell activation</b>             | <b>Calprotectin (mg/L)</b> | 68                                | 11.9   | 5.0 to 19.3  | 84                             | 30.4   | 18.0 to 42.6  | <0.001   |

IQR: interquartile range

**Table S3.** Univariate and multivariate analysis for the prediction of ICU admission and mortality

| Baseline characteristics           | Prediction of ICU admission |          |                       |          | Prediction of mortality |          |                       |          |
|------------------------------------|-----------------------------|----------|-----------------------|----------|-------------------------|----------|-----------------------|----------|
|                                    | Univariate analysis         |          | Multivariate analysis |          | Univariate analysis     |          | Multivariate analysis |          |
|                                    | OR [95%CI]                  | <i>p</i> | OR [95%CI]            | <i>p</i> | OR [95%CI]              | <i>p</i> | OR [95%CI]            | <i>p</i> |
| <b>Men –n (%)</b>                  | 2.20 [1.13-4.27]            | 0.019    | /                     | /        | 4.28 [1.19 – 15.44]     | 0.018    | /                     | /        |
| <b>Age &gt;60 years</b>            | 1.04 [0.55-1.96]            | 0.898    |                       |          | 8.84 [1.96 – 39.9]      | 0.001    | 16.4 [1.90 – 141]     | 0.011    |
| <b>Smoking –n (%)</b>              | 0.91 [0.42-1.98]            | 0.824    |                       |          | 2.81 [0.99 – 7.94]      | 0.047    | /                     | /        |
| <b>Cardiovascular Disease</b>      | 1.86 [0.96-3.59]            | 0.065    | /                     | /        | 2.10 [0.73 – 6.00]      | 0.162    | /                     | /        |
| <b>Overweight/obesity</b>          | 3.25 [1.40-7.52]            | 0.005    | 2.83 [1.19-6.74]      | 0.019    | 1.55 [0.57 – 4.23]      | 0.391    |                       |          |
| <b>Hypertension</b>                | 2.00 [1.03-3.87]            | 0.039    | /                     | /        | 2.20 [0.82 – 5.93]      | 0.114    | /                     | /        |
| <b>Diabetes</b>                    | 1.94 [0.92-4.09]            | 0.081    | /                     | /        | 1.66 [0.58 – 4.78]      | 0.347    |                       |          |
| <b>Chronic kidney Disease</b>      | 1.26 [0.44-3.58]            | 0.663    |                       |          | 1.10 [0.23 – 5.29]      | 0.907    |                       |          |
| <b>Chronic Resp Failure</b>        | 0.93 [0.21-4.04]            | 0.924    |                       |          | 2.34 [0.45 – 12.25]     | 0.303    |                       |          |
| <b>Systemic autoimmune Disease</b> | 0.76 [0.18-3.16]            | 0.704    |                       |          | 2.32 [0.44 – 12.1]      | 0.308    |                       |          |
| <b>Temperature &gt;38°C</b>        | 1.65 [0.78-3.50]            | 0.190    | /                     | /        | 1.35 [0.41 – 4.39]      | 0.615    | /                     | /        |
| <b>Caught</b>                      | 0.77 [0.40-1.48]            | 0.440    |                       |          | 0.52 [0.19 – 1.43]      | 0.195    | /                     | /        |
| <b>Dyspnea</b>                     | 6.69 [3.04-14.7]            | <0.001   | 3.67 [1.45-9.28]      | 0.006    | 2.30 [0.71 – 7.41]      | 0.155    | /                     | /        |

|                                              |                  |        |                  |       |                     |       |                   |       |
|----------------------------------------------|------------------|--------|------------------|-------|---------------------|-------|-------------------|-------|
| <b>Myalgias</b>                              | 0.49 [0.24-1.01] | 0.052  | /                | /     | 0.27 [0.06 – 1.23]  | 0.076 | /                 | /     |
| <b>Fatigue</b>                               | 0.68 [0.35-1.31] | 0.246  |                  |       | 0.79 [0.18 – 2.26]  | 0.668 |                   |       |
| <b>Diarrhea</b>                              | 0.56 [0.26-1.21] | 0.141  | /                | /     | 0.36 [0.08 – 1.65]  | 0.171 | /                 | /     |
| <b>Oxygenation</b>                           | 39.5 [5.2-297.2] | <0.001 | /                | /     | 6.64 [0.86 – 51.46] | 0.012 | /                 | /     |
| <b>Thiols values (log-transformed)</b>       | 0.01 [0.00-0.05] | <0.001 | 0.05 [0.01-0.58] | 0.017 | 0.03 [0.00 – 0.25]  | 0.001 | /                 | /     |
| <b>IL-6 values (log-transformed)</b>         | 4.0 [2.28-6,98]  | <0.001 | 2.56 [1.20-5.47] | 0.015 | 2.50 [1.31 – 4.78]  | 0.006 | /                 | /     |
| <b>Calprotectin values (log-transformed)</b> | 10.48 [3.9-28.4] | <0.001 | /                | /     | 19.1 [3.23 – 112.9] | 0.001 | 33.7 [3.37 - 337] | 0.003 |

OR, odds ratio. Grey zones indicate variables not included in the multivariate analysis.

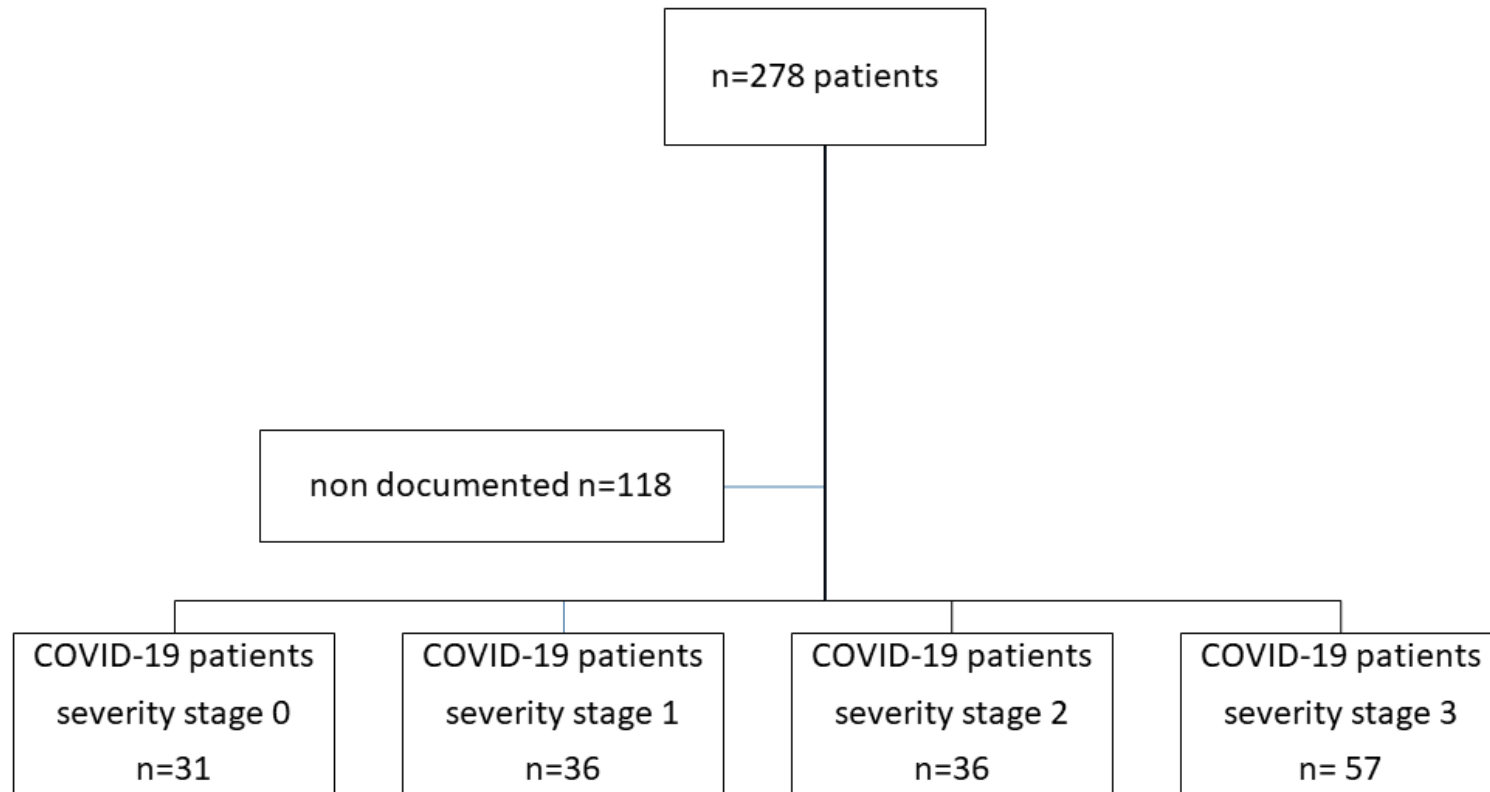

Figure S1

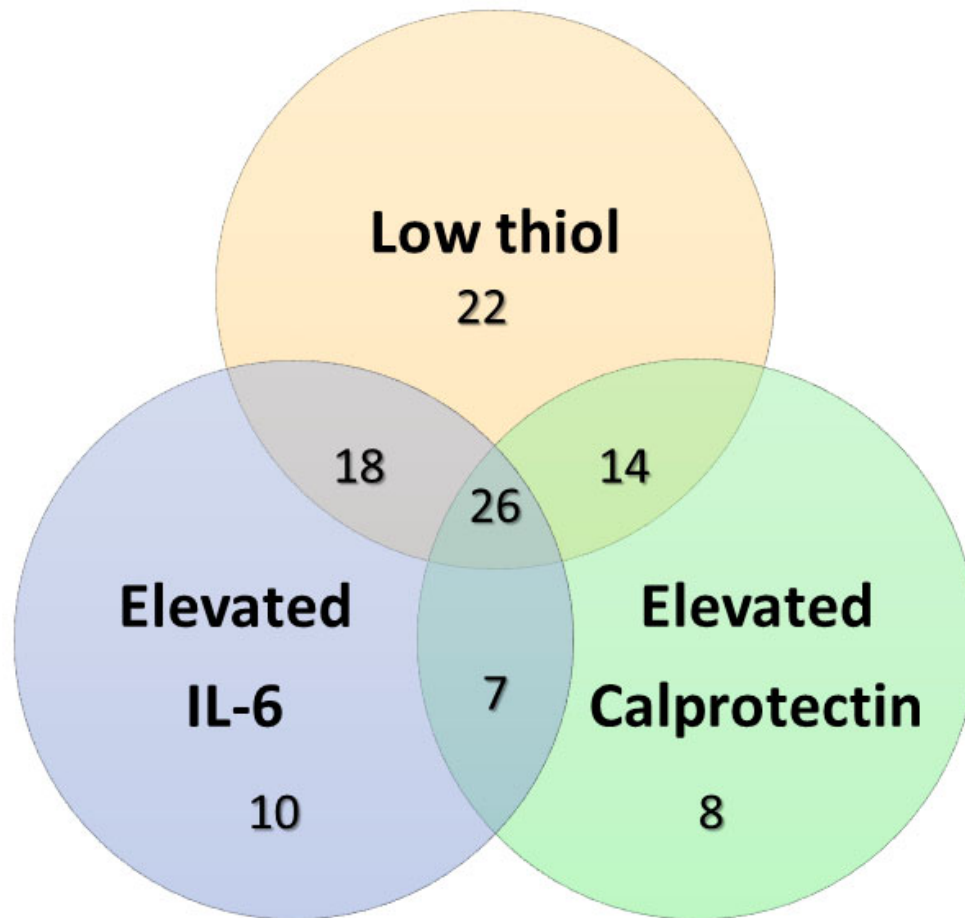

Figure S2
